# Supplementary material for: Costs of administering injectable contraceptives through health workers and self-injection: evidence from Burkina Faso, Uganda, and Senegal
Source: PubMed Central journal article supplement (PMC6197836; doi:10.1016/j.contraception.2018.05.018), 2018-11

Figure A1. One-way sensitivity analysis for the costs for facility-based delivery of DMPA-SC and DMPA-IM in Burkina Faso

Facility-based delivery of DMPA-SC - Burkina Faso

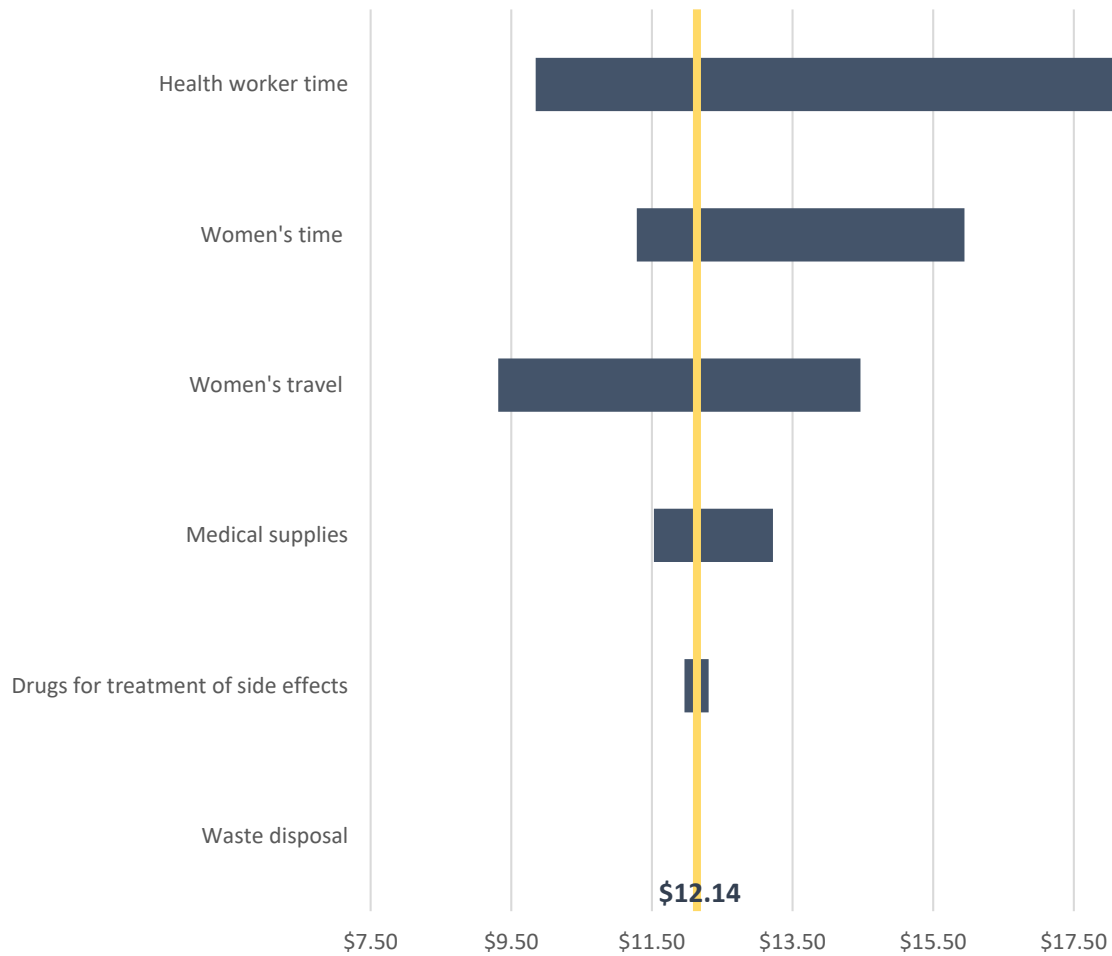

Facility-based delivery of DMPA-IM - Burkina Faso

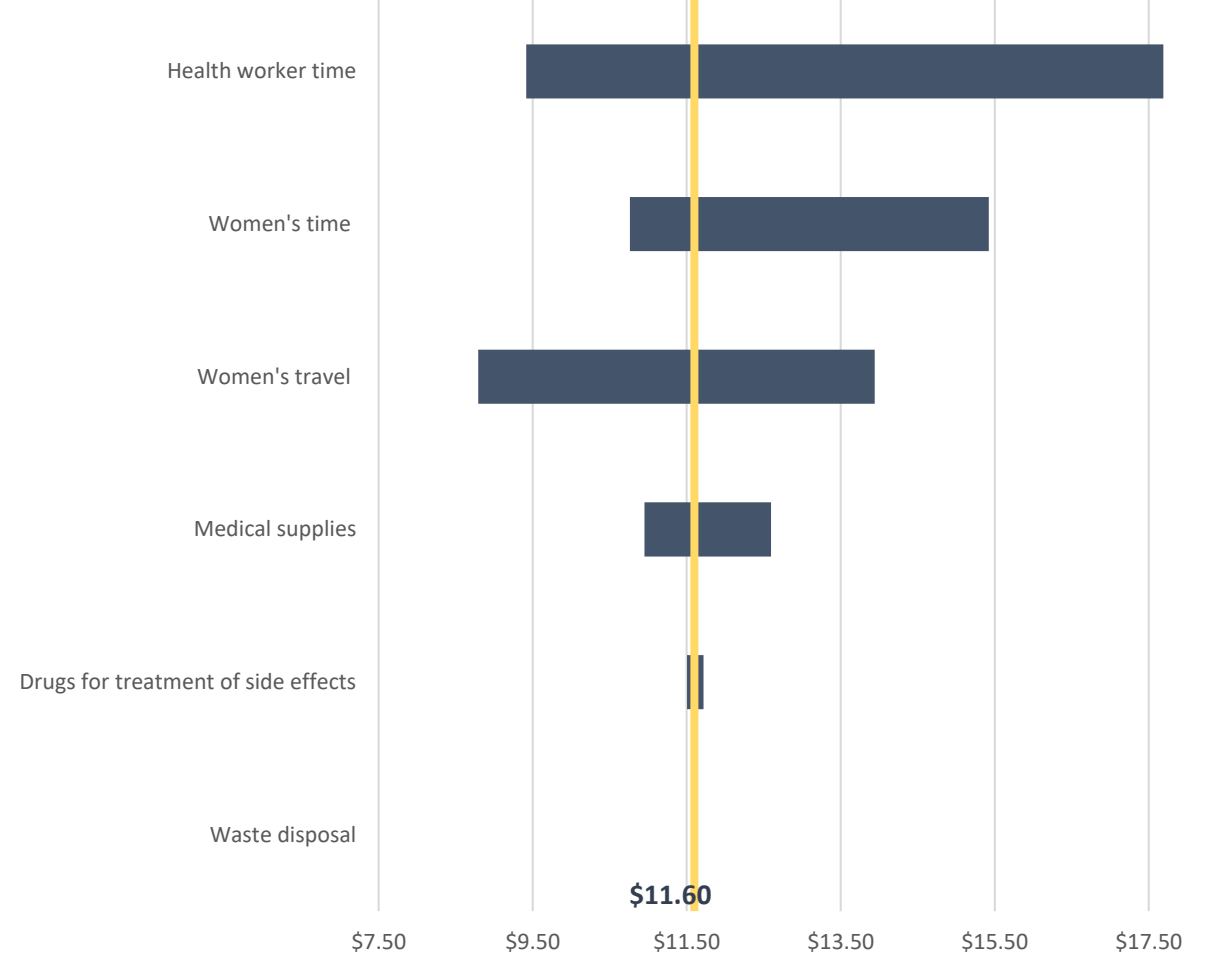

Supplement: mmc1.pdf [file mmc1.pdf]
