# Supplementary material for: Costs of administering injectable contraceptives through health workers and self-injection: evidence from Burkina Faso, Uganda, and Senegal
Source: PubMed Central journal article supplement (PMC6197836; doi:10.1016/j.contraception.2018.05.018), 2018-11

Figure A2. One-way sensitivity analysis for the costs for self-injection of DMPA-SC and facility-based delivery of DMPA-IM in Senegal

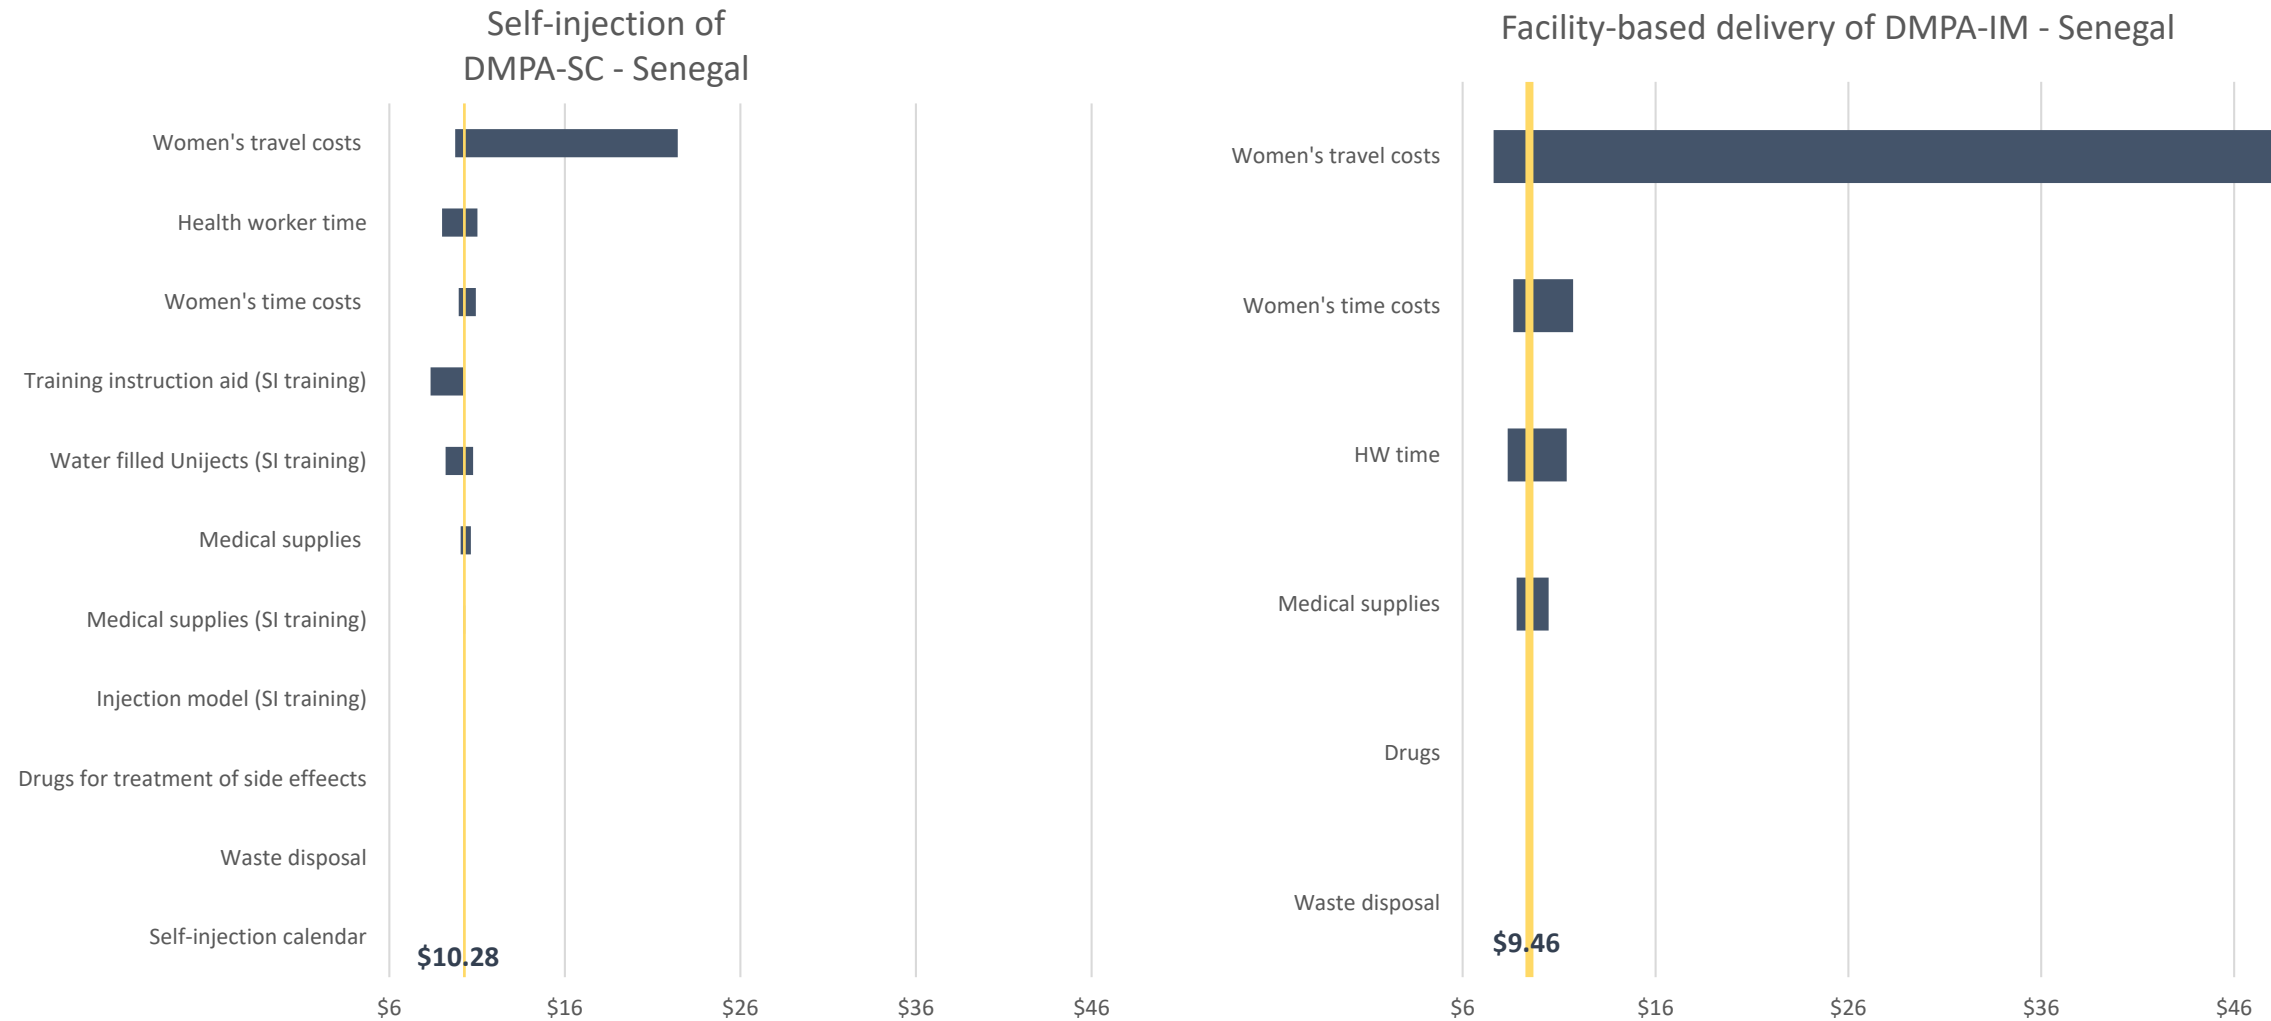

Supplement: mmc2.pdf [file mmc2.pdf]
